# Supplementary material for: Decreased miR-340 Expression in Bone Marrow Is Associated with Liver Metastasis of Colorectal Cancer
Source: Oxford University Press journal article supplement (doi:10.1158/1535-7163.mct-13-0571), 2014-01-21
Supplement: 15357163mct130571-sup-fig_leg.pdf [file 15357163mct130571-sup-fig_leg.pdf]

**Figure Legends**

**Supplementary Figure 1. qRT-PCR for miR-340 and miR-542-3p in BM4 in patients with and without liver metastasis.** qRT-PCR analysis showed that miR-340 and miR-542-3p expressions in the BM4 fraction from patients without liver metastasis were significantly higher compared to those from patients with liver metastasis ( $P = 0.008$  and  $0.015$ , respectively).

**Supplementary Figure 2. Over expression of miR-340 suppressed c-Met expression in HCT116 and SW480 *in vitro*.** (A) The expression levels of MITF of pre-miR-340-treated HCT116 and SW480 were suppressed to 4.0% and 5.0% of that of negative control miR-treated cells, respectively. (B) The expression levels of Survivin of pre-miR-542-3p-treated HCT116 and SW480 were suppressed to 56.2 and 66.4% of that of negative control miR-treated cells, respectively. The results are the mean  $\pm$  SE of two replicates.  $n = 3$  for each group,  $*P < 0.05$ , Mann-Whitney U test.
