# Supplementary material for: Decreased miR-340 Expression in Bone Marrow Is Associated with Liver Metastasis of Colorectal Cancer
Source: Oxford University Press journal article supplement (doi:10.1158/1535-7163.mct-13-0571), 2014-01-21
Supplement: 15357163mct130571-sup-tab_1.pdf [file 15357163mct130571-sup-tab_1.pdf]

Supplementary Table 1. Clinicopathologic factors of patients analyzed b  
miRNA array

| Clinicopathological variables   | Non-liver metastasis cases ( n = 12 ) | Liver metastasis cases ( n = 7 ) | P value              |
|---------------------------------|---------------------------------------|----------------------------------|----------------------|
| Gender                          |                                       |                                  |                      |
| Male                            | 6 (50.0%)                             | 4 (57.1%)                        |                      |
| Female                          | 6 (50.0%)                             | 3 (42.9%)                        | NS                   |
| Age (mean $\pm$ SD)             | 56.8 $\pm$ 11.8                       | 64.3 $\pm$ 8.38                  | NS                   |
| CRC tumor size (mean $\pm$ SD)  | 3.78 $\pm$ 2.31                       | 4.27 $\pm$ 2.14                  | NS                   |
| Histological grade <sup>a</sup> |                                       |                                  |                      |
| Well/mod                        | 12 (100%)                             | 6 (85.7%)                        |                      |
| Others                          | 0 (0%)                                | 1 (14.3%)                        | NS                   |
| Tumor invasion                  |                                       |                                  |                      |
| Tis/T1                          | 0 (0%)                                | 0 (0%)                           |                      |
| T2                              | 7 (58.7%)                             | 1 (14.3%)                        |                      |
| T3                              | 4 (33.3%)                             | 6 (85.7%)                        |                      |
| T4                              | 1 (8.33%)                             | 0 (0%)                           | NS                   |
| UICC Stage <sup>b</sup>         |                                       |                                  |                      |
| I                               | 6 (50%)                               | 0 (0%)                           |                      |
| II                              | 4 (33.3%)                             | 0 (0%)                           |                      |
| III                             | 2 (16.7%)                             | 2 (28.6%)                        |                      |
| IV                              | 0 (0%)                                | 5 (71.4%)                        | < 0.001 <sup>c</sup> |
| Lymphatic invasion              |                                       |                                  |                      |
| Absent                          | 4 (33.3%)                             | 0 (0%)                           |                      |
| Present                         | 8 (66.7%)                             | 7 (100%)                         | NS                   |
| Venous invasion                 |                                       |                                  |                      |
| Absent                          | 10 (83.3%)                            | 3 (42.9%)                        |                      |
| Present                         | 2 (16.7%)                             | 4 (57.1%)                        | NS                   |
| Lymph node metastasis           |                                       |                                  |                      |
| Absent                          | 10 (83.3%)                            | 0 (0%)                           |                      |
| Present                         | 2 (16.7%)                             | 7 (100%)                         | < 0.001 <sup>c</sup> |

<sup>a</sup>Histological grade. Well, well differentiated adenocarcinoma; Mod, moderately differentiated adenocacinoma; Others, poorly differentiated and mucinous adenocaricinoma.
