# Supplementary material for: Decreased miR-340 Expression in Bone Marrow Is Associated with Liver Metastasis of Colorectal Cancer
Source: Oxford University Press journal article supplement (doi:10.1158/1535-7163.mct-13-0571), 2014-01-21
Supplement: 15357163mct130571-sup-tab_2.pdf [file 15357163mct130571-sup-tab_2.pdf]

Supplementary Table 2. miR-340 expression and clinicopathologic factors

| Clinicopathological variables   | High miR-340 expression group ( <i>n</i> = 63) | Low miR-340 expression group ( <i>n</i> = 73) | <i>P</i> value |
|---------------------------------|------------------------------------------------|-----------------------------------------------|----------------|
| Gender                          |                                                |                                               |                |
| Male                            | 32                                             | 45                                            | NS             |
| Female                          | 31                                             | 28                                            |                |
| Size (mean ± SD)                | 4.14 ± 1.73                                    | 5.29 ± 1.86                                   | < 0.001        |
| Histological grade <sup>a</sup> |                                                |                                               |                |
| Well/Mod                        | 58                                             | 68                                            | NS             |
| Others                          | 5                                              | 5                                             |                |
| Serosal invasion                |                                                |                                               |                |
| Absent                          | 48                                             | 56                                            | NS             |
| Present                         | 15                                             | 17                                            |                |
| UICC Stage                      |                                                |                                               |                |
| 0                               | 3                                              | 1                                             | NS             |
| I                               | 9                                              | 6                                             |                |
| II                              | 20                                             | 18                                            |                |
| III                             | 31                                             | 48                                            |                |
| Lymphatic invasion              |                                                |                                               |                |
| Absent                          | 18                                             | 28                                            | NS             |
| Present                         | 45                                             | 45                                            |                |
| Venous invasion                 |                                                |                                               |                |
| Absent                          | 29                                             | 37                                            | NS             |
| Present                         | 34                                             | 36                                            |                |
| Lymph node metastasis           |                                                |                                               |                |
| Absent                          | 32                                             | 25                                            | NS             |
| Present                         | 31                                             | 48                                            |                |

<sup>a</sup>Histological grade. Well, well differentiated adenocarcinoma; Mod, moderately differentiated adenocarcinoma; Others, poorly differentiated and mucinous adenocarcinoma.
